# Supplementary material
Source: PubMed Central journal article supplement (PMC5951397)

## SUPPLEMENTAL MATERIAL

### Supplemental Table 1:

Characteristics associated with the use of lipid lowering therapy associated with  $\geq 50\%$  LDL-C reduction among patients with LDL-C  $\geq 190$  mg/dL

| <b>Variable</b>                                                                                                | <b>OR/95% CI</b>                                        | <b>p value</b>         |
|----------------------------------------------------------------------------------------------------------------|---------------------------------------------------------|------------------------|
| Age (per 10-year increase)                                                                                     | 0.95 (0.93-0.96)                                        | <0.0001                |
| Public versus private insurance                                                                                | 1 (0.96 -1.05)                                          | 0.95                   |
| Female sex                                                                                                     | 0.9 (0.87-0.93)                                         | <0.0001                |
| History of hypertension                                                                                        | 1.06 (1.02-1.1)                                         | 0.0013                 |
| History of diabetes                                                                                            | 1.24 (1.2-1.29)                                         | <0.0001                |
| Current smoker                                                                                                 | 1.06 (1.01-1.1)                                         | 0.0076                 |
| History of CAD                                                                                                 | 1.3 (1.25-1.34)                                         | <0.0001                |
| History of ischemic stroke                                                                                     | 1.2 (1.14-1.15)                                         | <0.0001                |
| History of PAD                                                                                                 | 1.09 (1.04-1.15)                                        | 0.0004                 |
| Practice location (West as referent):<br>Midwest<br>Northeast<br>South                                         | 0.74 (0.54-0.9)<br>0.87 (0.64-1.18)<br>0.68 (0.53-0.87) | 0.045<br>0.36<br>0.002 |
| Number of years of participation by the practice in the PINNACLE <sup>®</sup> registry (per one-year increase) | 0.99 (0.95-1.04)                                        | 0.72                   |

OR= odds ratio, CI = confidence interval, CAD = coronary artery disease, PAD = peripheral artery disease, PINNACLE<sup>®</sup> = Practice Innovation and Clinical Excellence

**Supplemental Figure 1:** Quarterly time trends in the use of ezetimibe in patients with LDL-C  $\geq 190$  mg/dL.

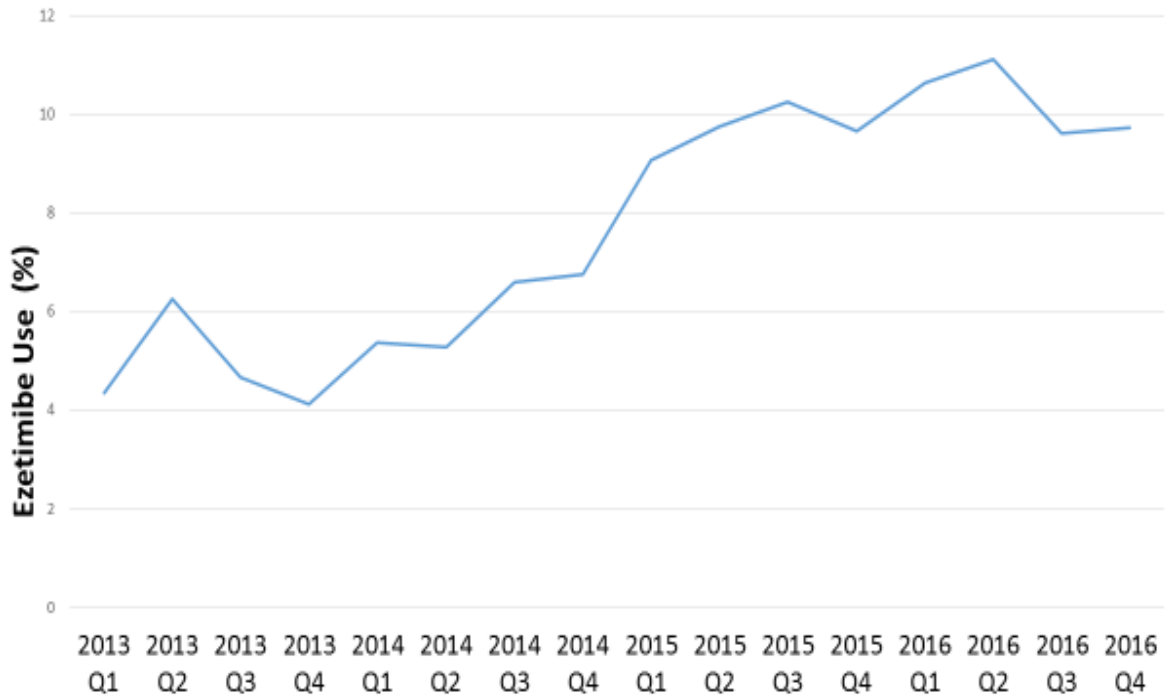

**Supplemental Figure 2:** Quarterly time trends in the use of PCSK9 inhibitor in patients with LDL-C  $\geq 190$  mg/dL.

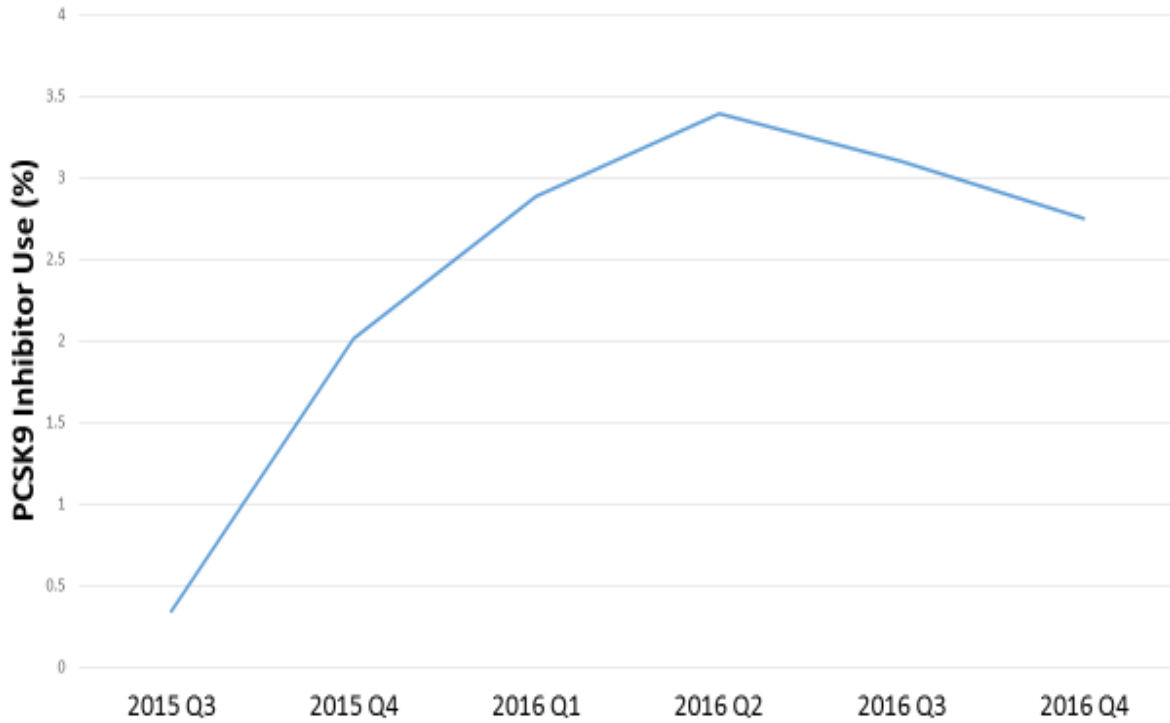

Supplement: NIHMS961354-supplement-Supplemental_Material.pdf [file NIHMS961354-supplement-Supplemental_Material.pdf]
